# Supplementary material
Source: ML conference proceedings conference paper supplement (https://openaccess.thecvf.com/content/CVPR2023/html/Narayan_DF-Platter_Multi-Face_Heterogeneous_CVPR_2023_paper.html)
Supplement: Supplementary file 1 [file Narayan_DF-Platter_Multi-Face_Heterogeneous_CVPR_2023_supplemental.pdf]

# DF-Platter: Multi-Face Heterogeneous Deepfake Dataset

Kartik Narayan\*, Harsh Agarwal\*, Kartik Thakral\*, Surbhi Mittal\*, Mayank Vatsa, and Richa Singh  
IIT Jodhpur, India

{narayan.2, agarwal.10, thakral.1, mittal.5, mvatsa, richa}@iitj.ac.in

## 1. Video Generation Details

In this section, we provide an estimate of the generation time of videos through each generation algorithm, thereby accounting for the generation time of each set in the proposed DF-Platter dataset. The videos in different sets of the proposed dataset are generated using three techniques: FaceSwap [1], FaceShifter [2], and FSGAN [3]. For FaceSwap, each video is generated after 8 hours of training on 16 Nvidia A100 GPUs of 80GB memory each and 12 Nvidia V100 GPUs of 32GB memory each. Similarly, videos were generated using pre-trained weights of FaceShifter with default parameters on three Nvidia RTX 3090 GPUs of 24 GB memory each. Furthermore, the re-enactment generator of FSGAN is fine-tuned for each source video and inferencing is performed using 12 Nvidia V100 GPUs of 32GB memory each and an Nvidia DGX A40 GPU of 48 GB memory. The dataset generation is detailed in Table 1. The table reports the effective real-time for generating the proposed dataset after parallel processing.

For FSGAN [3] and Faceshifter [2], 65,948 videos were generated, encompassing all three sets. Videos generated using FSGAN [3] were trained on ten different GPUs in parallel. This reduced the effective time to generate one video to 0.8 minutes. Similarly, videos generated using Faceshifter were trained on four different GPUs in parallel. This helped reduce the effective video generation time to 1.25 minutes. Since Faceswap [1] requires more time for training, videos were generated using 16 different GPUs. This greatly reduced the effective generation time for one video to 30 minutes. Furthermore, some videos required training for an additional 16 hours as the resultant deepfake is poor. The generation is completed in approximately 116 days. For generating the compressed versions of the dataset, it took a total of 4 days on an AMD 24-core processor.

## 2. Results and Analysis

We evaluate various state-of-the-art deepfake detection algorithms on the proposed DF-Platter dataset. We perform

thorough benchmarking experiments and report the results obtained. The models are trained and tested for different combinations of compression and resolution. In each table presented in this supplementary, we report the performance obtained by different deepfake detectors on the test set (using a single train and validation split). The models are trained on all the combinations (as described in the first column of the tables) other than those which are already covered in the main paper. Table 4 reports the results obtained on (c0, HR) videos of the DF-Platter dataset. From the table, we can observe that the models trained on (c23, HR) deepfake videos achieve the best performance, followed by the models trained on (c0, LR) videos. Table 5 reports the results obtained on (c23, HR) videos of the dataset when trained on different configurations of compression and resolution. For Set A, models trained on (c0, HR) and (c0, LR) videos of the dataset achieve competitive performance.

In Table 6, we report the performance obtained after testing the deepfake detection models on (c40, HR) videos of the dataset when trained on other variations of resolution and compression. The models trained on (c23, LR) and (c40, LR) videos of the dataset achieve competitive performance. In Table 7, it can be observed that the models trained on (c23, LR) performs the best after (c0, LR) videos of the dataset. This can be attributed to same observations made in the previous baseline experiments. The best performance is achieved through training on (c0, LR) videos as training and testing and performed on the same configuration of the dataset. Similarly, Table 8 reports the performance of different algorithms obtained on (LR, c23) videos of the dataset when trained on different combinations. For Set A, the models trained on (c0, LR) videos of the dataset perform the best while for Set B and Set C, the models trained on (c40, LR) perform the best after the models trained on the same setting of (c23, LR) videos. This can be attributed to the fact that models trained on higher compression and lower resolution are trained to distinguish between the artifacts of deepfake and compression. Due to this, the model is also able to generalize better on (c23, LR) videos of the dataset. The same inference can be made for the performance reported in Table 9, where the models trained on the

\*Equal contribution by student authors.

Table 1. Generation time for videos in different sets of the proposed DF-Platter dataset using the FSGAN, FaceShifter and FaceSwap techniques. The time is reported in minutes unless explicitly specified otherwise.

| Sets       | FSGAN            |                | Faceshifter      |                | FaceSwap         |                | Time taken for each set (in mins) |
|------------|------------------|----------------|------------------|----------------|------------------|----------------|-----------------------------------|
|            | Number of Videos | Time (in mins) | Number of Videos | Time (in mins) | Number of Videos | Time (in mins) |                                   |
| Set A      | 65,348           | 52,279         | 65,348           | 81,685         | -                | -              | 133,964                           |
| Set B      | 300              | 240            | 300              | 375            | 300              | 11880          | 12,495                            |
| Set C      | 300              | 240            | 300              | 375            | 300              | 11880          | 12,495                            |
| Total time | 52,759           |                | 82,435           |                | 18,000           |                | ~112 days                         |

Table 2. p-value and statistic value of McNemar test with DSP-FWA and CapsuleNet trained and tested on different compression factors and resolution.

| Trained on | Tested on | Set A   |           | Set B     |           | Set C     |           |
|------------|-----------|---------|-----------|-----------|-----------|-----------|-----------|
|            |           | p-value | statistic | p-value   | statistic | p-value   | statistic |
| c0, HR     | c0, HR    | 0       | 4569.5887 | 6.1933    | 546.8192  | 2.17e-67  | 300.8265  |
| c23, HR    | c23, HR   | 0       | 9739.3265 | 1.92e-101 | 457.2272  | 4.37e-127 | 575.0954  |
| c40, HR    | c40, HR   | 0       | 282.6047  | 0.4174    | 0.6575    | 2.60e-08  | 30.9452   |
| c0, HR     | c0, LR    | 0       | 1626.338  | 7.44e-19  | 78.6415   | 1.47e-05  | 14.4084   |
| c23, HR    | c40, HR   | 0       | 7093.7296 | 5.16e-28  | 120.4029  | 2.54e-53  | 236.2825  |

Table 3. Performance Accuracy (%) of Capsule model when trained on (c0, LR) and (c40, HR) videos and tested on LR videos across different compressions of the DF-Platter dataset.

| Trained on   | Uncompressed LR (c0, LR) | Compressed HR (c40, HR) |
|--------------|--------------------------|-------------------------|
| Test LR, c0  | 93.10                    | 84.42                   |
| Test LR, c23 | 91.46                    | 83.98                   |
| Test LR, c40 | 84.70                    | 82.39                   |

(LR, c40) videos of the dataset perform the best.

We have also calculated the McNemar test results of the tables in the main paper to show the statistical significance of the accuracy values. Table 2 shows the McNemar results of the dataset when trained and tested on different compressions and resolutions. The results are calculated for DSP-FWA and Capsule. It can be inferred that the results are statistically significant except in two cases when (a) Trained on Set A (c0, HR) and tested on Set B (c0, HR) and (b) Trained on Set A (c40, HR) and tested on SetB (c40, HR).

**Difference between uncompressed low-resolution (c0, LR) and compressed high-resolution (c40, HR):** We trained the Capsule model on (c0, LR) and (c40, HR) videos from Set A and evaluate their performance on the test sets of Set A. From Table 3, it can be inferred that models, when trained on uncompressed LR deepfakes, perform better when detecting LR deepfakes across various compression levels. Additionally, the visual quality of Uncompressed LR deepfakes are better than Compressed HR deepfakes with BRISQUE scores of 33.03 and 46.24, respectively.

## References

- [1] Faceswap. <https://github.com/MarekKowalski/FaceSwap/>. [Accessed: 27-April-2022]. 1
- [2] Lingzhi Li, Jianmin Bao, Hao Yang, Dong Chen, and Fang Wen. Faceshifter: Towards high fidelity and occlusion aware face swapping. *CoRR*, abs/1912.13457, 2019. 1
- [3] Yuval Nirkin, Yosi Keller, and Tal Hassner. Fsgan: Subject agnostic face swapping and reenactment. In *IEEE/CVF ICCV*, pages 7184–7193, 2019. 1

Table 4. Performance obtained on the (c0, HR) test set of the proposed DF-Platter dataset for Sets A, B, and C. The models are trained for different combinations of resolution and compression as specified in the first column of the table. The performance is reported using Frame-level Accuracy (FLA) (%), AUC Scores, Face-wise Accuracy (FaceWA) (%), Face-wise AUC score (FaceAUC), and Video-level Accuracy (VLA) (%) as explained in the main paper.

| Trained on | Models         | Set A    |        | Set B  |         |       |       | Set C  |         |       |       |
|------------|----------------|----------|--------|--------|---------|-------|-------|--------|---------|-------|-------|
|            |                | Accuracy | AUC    | FaceWA | FaceAUC | FLA   | VLA   | FaceWA | FaceAUC | FLA   | VLA   |
| c0, LR     | MesoNet        | 80.95    | 0.7143 | 81.17  | 0.5527  | 60.76 | 64.97 | 83.02  | 0.7652  | 66.25 | 65.41 |
|            | Meso-Inception | 68.92    | 0.7145 | 71.21  | 0.5996  | 45.58 | 44.79 | 73.26  | 0.7816  | 54.13 | 41.46 |
|            | FWA            | 62.53    | 0.7111 | 68.17  | 0.6355  | 40.00 | 37.92 | 66.62  | 0.7477  | 45.24 | 28.82 |
|            | Xception       | 78.86    | 0.6773 | 76.86  | 0.5450  | 55.24 | 58.98 | 78.59  | 0.7400  | 59.40 | 54.77 |
|            | DSP-FWA        | 79.50    | 0.5000 | 90.85  | 0.5000  | 90.00 | 99.78 | 86.96  | 0.5000  | 74.38 | 99.78 |
|            | Capsule        | 85.18    | 0.8602 | 79.08  | 0.6995  | 58.52 | 60.31 | 77.20  | 0.7979  | 60.25 | 53.44 |
| c23, HR    | MesoNet        | 82.39    | 0.5866 | 87.41  | 0.5494  | 77.82 | 85.81 | 86.21  | 0.6588  | 72.56 | 82.71 |
|            | Meso-Inception | 81.91    | 0.6455 | 81.14  | 0.5589  | 63.30 | 67.18 | 82.56  | 0.7143  | 64.83 | 66.08 |
|            | FWA            | 84.89    | 0.6978 | 83.38  | 0.5880  | 68.46 | 74.28 | 83.16  | 0.7037  | 68.35 | 72.95 |
|            | Xception       | 81.02    | 0.5590 | 84.02  | 0.5293  | 69.18 | 77.38 | 82.62  | 0.5740  | 65.11 | 78.71 |
|            | DSP-FWA        | 91.24    | 0.8203 | 81.67  | 0.6060  | 61.04 | 63.64 | 83.99  | 0.8116  | 66.69 | 61.86 |
|            | Capsule        | 89.29    | 0.7501 | 87.12  | 0.5351  | 78.30 | 87.36 | 85.60  | 0.7299  | 71.34 | 75.83 |
| c23, LR    | MesoNet        | 81.74    | 0.6413 | 86.20  | 0.5587  | 74.74 | 82.26 | 84.99  | 0.6868  | 71.34 | 77.38 |
|            | Meso-Inception | 80.00    | 0.7129 | 78.41  | 0.5656  | 60.60 | 63.41 | 79.93  | 0.7250  | 64.10 | 63.41 |
|            | FWA            | 75.47    | 0.7421 | 74.94  | 0.6088  | 51.50 | 51.44 | 73.88  | 0.7224  | 53.21 | 44.79 |
|            | Xception       | 80.49    | 0.6365 | 83.19  | 0.5531  | 67.06 | 74.50 | 83.03  | 0.6678  | 65.42 | 72.95 |
|            | DSP-FWA        | 81.77    | 0.7782 | 81.44  | 0.6154  | 63.48 | 66.08 | 81.21  | 0.7612  | 64.99 | 62.53 |
|            | Capsule        | 86.08    | 0.8448 | 82.77  | 0.6707  | 67.28 | 69.62 | 82.68  | 0.8265  | 66.74 | 60.98 |
| c40, HR    | MesoNet        | 81.35    | 0.5967 | 84.91  | 0.5555  | 71.48 | 78.71 | 82.42  | 0.6351  | 66.05 | 73.84 |
|            | Meso-Inception | 80.70    | 0.6144 | 82.84  | 0.5580  | 67.96 | 74.94 | 80.24  | 0.6164  | 61.90 | 68.96 |
|            | FWA            | 83.22    | 0.6976 | 81.34  | 0.6038  | 60.66 | 64.75 | 80.29  | 0.7017  | 60.38 | 60.98 |
|            | Xception       | 80.63    | 0.5836 | 82.34  | 0.5453  | 66.80 | 74.28 | 81.22  | 0.6317  | 64.58 | 72.95 |
|            | DSP-FWA        | 90.88    | 0.8066 | 80.08  | 0.6058  | 58.44 | 62.08 | 80.93  | 0.7838  | 62.83 | 57.21 |
|            | Capsule        | 87.12    | 0.8014 | 79.38  | 0.6691  | 55.20 | 56.76 | 78.24  | 0.7569  | 57.69 | 52.11 |
| c40, LR    | MesoNet        | 73.56    | 0.5808 | 80.05  | 0.5444  | 60.66 | 64.97 | 79.39  | 0.6494  | 60.81 | 63.19 |
|            | Meso-Inception | 74.41    | 0.6397 | 73.99  | 0.5442  | 49.08 | 50.55 | 74.55  | 0.6647  | 51.42 | 48.56 |
|            | FWA            | 71.44    | 0.6649 | 74.94  | 0.5586  | 51.40 | 53.22 | 76.15  | 0.6883  | 56.88 | 55.21 |
|            | Xception       | 76.22    | 0.5630 | 82.47  | 0.5396  | 65.12 | 72.06 | 82.43  | 0.6167  | 63.98 | 74.28 |
|            | DSP-FWA        | 74.76    | 0.6345 | 75.45  | 0.5664  | 52.44 | 56.98 | 77.18  | 0.7033  | 55.80 | 54.99 |
|            | Capsule        | 78.50    | 0.6299 | 86.92  | 0.5858  | 76.56 | 83.59 | 86.76  | 0.7638  | 73.72 | 78.27 |

Table 5. Performance obtained on the (c23, HR) test set of the proposed DF-Platter dataset for Sets A, B, and C. The models are trained for different combinations of resolution and compression as specified in the first column of the table. The performance is reported using Frame-level Accuracy (FLA) (%), AUC Scores, Face-wise Accuracy (FaceWA) (%), Face-wise AUC score (FaceAUC), and Video-level Accuracy (VLA) (%) as explained in the main paper.

| Trained on | Models         | Set A    |        | Set B  |         |       |       | Set C  |         |       |       |
|------------|----------------|----------|--------|--------|---------|-------|-------|--------|---------|-------|-------|
|            |                | Accuracy | AUC    | FaceWA | FaceAUC | FLA   | VLA   | FaceWA | FaceAUC | FLA   | VLA   |
| c0, HR     | MesoNet        | 82.98    | 0.5833 | 87.13  | 0.5467  | 77.26 | 84.26 | 87.23  | 0.6894  | 73.67 | 82.71 |
|            | Meso-Inception | 83.21    | 0.6388 | 82.18  | 0.5508  | 64.06 | 71.62 | 82.54  | 0.6779  | 64.26 | 71.18 |
|            | FWA            | 83.43    | 0.6598 | 80.43  | 0.5764  | 61.90 | 67.18 | 79.04  | 0.6770  | 59.90 | 61.64 |
|            | Xception       | 80.26    | 0.5311 | 87.57  | 0.5328  | 79.44 | 89.80 | 85.33  | 0.5899  | 68.36 | 87.80 |
|            | DSP-FWA        | 89.58    | 0.7798 | 78.47  | 0.5631  | 57.10 | 60.75 | 82.97  | 0.7751  | 65.31 | 64.08 |
|            | Capsule        | 87.29    | 0.7032 | 86.17  | 0.5930  | 71.80 | 79.16 | 87.18  | 0.7587  | 72.55 | 75.83 |
| c0, LR     | MesoNet        | 80.51    | 0.6920 | 81.81  | 0.5487  | 62.08 | 66.52 | 83.56  | 0.7474  | 67.01 | 67.85 |
|            | Meso-Inception | 68.34    | 0.6998 | 73.76  | 0.6041  | 50.52 | 51.88 | 75.52  | 0.7880  | 56.46 | 46.56 |
|            | FWA            | 61.06    | 0.6959 | 68.57  | 0.6097  | 40.24 | 38.36 | 67.88  | 0.7494  | 47.06 | 31.71 |
|            | Xception       | 77.60    | 0.6504 | 77.56  | 0.5442  | 56.26 | 60.31 | 79.65  | 0.7320  | 61.37 | 59.42 |
|            | DSP-FWA        | 81.31    | 0.5000 | 90.85  | 0.5000  | 90.00 | 99.78 | 86.98  | 0.5000  | 74.38 | 99.78 |
|            | Capsule        | 84.11    | 0.8453 | 78.34  | 0.6755  | 56.36 | 56.32 | 76.92  | 0.7787  | 58.69 | 51.66 |
| c23, LR    | MesoNet        | 81.29    | 0.6270 | 86.20  | 0.5551  | 74.80 | 81.60 | 85.53  | 0.6851  | 72.53 | 79.60 |
|            | Meso-Inception | 78.58    | 0.6962 | 78.82  | 0.5718  | 61.12 | 64.75 | 80.50  | 0.7321  | 64.63 | 64.08 |
|            | FWA            | 74.22    | 0.7285 | 75.65  | 0.6052  | 52.50 | 54.10 | 75.01  | 0.7153  | 54.17 | 48.78 |
|            | Xception       | 79.68    | 0.6219 | 82.97  | 0.5541  | 66.42 | 74.50 | 83.25  | 0.6692  | 65.42 | 73.39 |
|            | DSP-FWA        | 80.09    | 0.7569 | 81.01  | 0.6048  | 62.82 | 65.19 | 81.25  | 0.7576  | 64.68 | 62.97 |
|            | Capsule        | 84.31    | 0.8229 | 82.32  | 0.6569  | 65.96 | 68.51 | 83.24  | 0.8239  | 67.90 | 63.19 |
| c40, HR    | MesoNet        | 82.00    | 0.5848 | 85.53  | 0.5550  | 73.12 | 80.27 | 82.99  | 0.6290  | 66.89 | 77.16 |
|            | Meso-Inception | 81.26    | 0.6055 | 82.34  | 0.5453  | 66.92 | 73.84 | 80.35  | 0.6114  | 61.72 | 70.29 |
|            | FWA            | 83.22    | 0.6812 | 81.46  | 0.6013  | 61.18 | 64.75 | 81.06  | 0.7034  | 61.59 | 63.41 |
|            | Xception       | 81.16    | 0.5747 | 83.30  | 0.5588  | 68.46 | 75.17 | 81.50  | 0.6273  | 64.21 | 72.06 |
|            | DSP-FWA        | 89.21    | 0.7762 | 80.63  | 0.6024  | 60.16 | 65.19 | 81.22  | 0.7705  | 62.79 | 59.65 |
|            | Capsule        | 86.30    | 0.7763 | 80.28  | 0.6517  | 57.84 | 60.75 | 78.98  | 0.7381  | 58.78 | 55.88 |
| c40, LR    | MesoNet        | 74.23    | 0.5760 | 79.74  | 0.5423  | 60.02 | 63.86 | 79.19  | 0.6453  | 60.64 | 63.19 |
|            | Meso-Inception | 74.64    | 0.6360 | 73.79  | 0.5437  | 49.06 | 52.77 | 74.40  | 0.6596  | 51.47 | 47.67 |
|            | FWA            | 71.75    | 0.6637 | 74.31  | 0.5420  | 51.18 | 53.88 | 76.43  | 0.6810  | 57.11 | 55.65 |
|            | Xception       | 76.59    | 0.5596 | 82.62  | 0.5372  | 65.46 | 73.17 | 82.35  | 0.6163  | 63.93 | 75.17 |
|            | DSP-FWA        | 74.92    | 0.6306 | 75.60  | 0.5633  | 52.68 | 57.65 | 77.52  | 0.6948  | 56.33 | 56.32 |
|            | Capsule        | 78.83    | 0.6156 | 86.76  | 0.5757  | 76.62 | 83.81 | 87.08  | 0.7486  | 73.92 | 80.27 |

Table 6. Performance obtained on the (c40, HR) test set of the proposed DF-Platter dataset for Sets A, B, and C. The models are trained for different combinations of resolution and compression as specified in the first column of the table. The performance is reported using Frame-level Accuracy (FLA) (%), AUC Scores, Face-wise Accuracy (FaceWA) (%), Face-wise AUC score (FaceAUC), and Video-level Accuracy (VLA) (%) as explained in the main paper.

| Trained on | Models         | Set A    |        | Set B  |         |       |       | Set C  |         |       |       |
|------------|----------------|----------|--------|--------|---------|-------|-------|--------|---------|-------|-------|
|            |                | Accuracy | AUC    | FaceWA | FaceAUC | FLA   | VLA   | FaceWA | FaceAUC | FLA   | VLA   |
| c0, HR     | MesoNet        | 82.02    | 0.5278 | 89.28  | 0.5307  | 83.44 | 91.57 | 87.50  | 0.6031  | 72.66 | 90.69 |
|            | Meso-Inception | 82.98    | 0.5850 | 83.36  | 0.5436  | 66.48 | 73.61 | 82.84  | 0.6200  | 63.29 | 73.39 |
|            | FWA            | 83.09    | 0.5994 | 82.41  | 0.5627  | 65.70 | 70.95 | 78.28  | 0.5906  | 57.09 | 64.52 |
|            | Xception       | 81.46    | 0.5298 | 86.40  | 0.5163  | 76.44 | 87.14 | 83.67  | 0.5319  | 65.04 | 83.81 |
|            | DSP-FWA        | 86.11    | 0.6735 | 74.31  | 0.5105  | 49.98 | 54.32 | 76.88  | 0.6295  | 53.40 | 55.43 |
|            | Capsule        | 84.80    | 0.6112 | 86.45  | 0.5511  | 74.56 | 82.48 | 84.46  | 0.6238  | 66.61 | 78.71 |
| c0, LR     | MesoNet        | 82.46    | 0.6260 | 84.34  | 0.5293  | 69.46 | 75.83 | 85.86  | 0.7051  | 69.50 | 77.16 |
|            | Meso-Inception | 75.74    | 0.6946 | 77.57  | 0.5754  | 55.46 | 59.42 | 79.65  | 0.7641  | 60.83 | 56.76 |
|            | FWA            | 67.83    | 0.6954 | 72.97  | 0.5875  | 46.16 | 44.79 | 73.76  | 0.7578  | 53.19 | 41.91 |
|            | Xception       | 80.69    | 0.5969 | 81.60  | 0.5295  | 64.00 | 71.18 | 82.21  | 0.7067  | 63.60 | 66.96 |
|            | DSP-FWA        | 81.31    | 0.5000 | 90.96  | 0.5000  | 90.00 | 99.78 | 87.68  | 0.5000  | 74.38 | 99.78 |
|            | Capsule        | 82.94    | 0.7880 | 78.20  | 0.6119  | 57.82 | 62.31 | 80.26  | 0.8048  | 64.08 | 57.65 |
| c23, LR    | MesoNet        | 82.05    | 0.5741 | 87.59  | 0.5370  | 78.38 | 87.14 | 86.42  | 0.6501  | 71.88 | 83.37 |
|            | Meso-Inception | 80.96    | 0.6591 | 81.59  | 0.5527  | 64.54 | 69.18 | 82.38  | 0.6631  | 65.14 | 71.62 |
|            | FWA            | 78.43    | 0.7121 | 76.46  | 0.5816  | 52.04 | 54.32 | 77.57  | 0.7049  | 56.94 | 54.10 |
|            | Xception       | 81.10    | 0.5974 | 80.85  | 0.5367  | 61.28 | 68.29 | 81.34  | 0.6268  | 60.56 | 68.29 |
|            | DSP-FWA        | 80.40    | 0.6890 | 82.52  | 0.5746  | 65.46 | 70.95 | 82.01  | 0.6813  | 63.64 | 67.41 |
|            | Capsule        | 84.40    | 0.7491 | 83.13  | 0.6015  | 67.90 | 72.28 | 85.34  | 0.7641  | 70.76 | 74.06 |
| c40, LR    | MesoNet        | 75.61    | 0.5653 | 72.18  | 0.5139  | 47.46 | 50.11 | 78.84  | 0.6226  | 59.29 | 63.41 |
|            | Meso-Inception | 75.88    | 0.6295 | 70.77  | 0.5329  | 40.74 | 42.79 | 71.72  | 0.6268  | 45.72 | 41.91 |
|            | FWA            | 72.45    | 0.6514 | 73.11  | 0.5363  | 47.08 | 48.34 | 75.29  | 0.6783  | 54.78 | 52.33 |
|            | Xception       | 77.25    | 0.5566 | 81.01  | 0.5405  | 61.98 | 66.96 | 81.70  | 0.6137  | 61.47 | 71.40 |
|            | DSP-FWA        | 75.16    | 0.6112 | 76.00  | 0.5598  | 53.18 | 56.54 | 77.61  | 0.6974  | 56.31 | 56.32 |
|            | Capsule        | 79.37    | 0.6413 | 83.46  | 0.5645  | 69.16 | 75.17 | 83.23  | 0.7251  | 67.55 | 69.84 |

Table 7. Performance obtained on the (c0, LR) test set of the proposed DF-Platter dataset for Sets A, B, and C. The models are trained for different combinations of resolution and compression as specified in the first column of the table. The performance is reported using Frame-level Accuracy (FLA) (%), AUC Scores, Face-wise Accuracy (FaceWA) (%), Face-wise AUC score (FaceAUC), and Video-level Accuracy (VLA) (%) as explained in the main paper.

| Trained on | Models         | Set A    |        | Set B  |         |       |       | Set C  |         |       |       |
|------------|----------------|----------|--------|--------|---------|-------|-------|--------|---------|-------|-------|
|            |                | Accuracy | AUC    | FaceWA | FaceAUC | FLA   | VLA   | FaceWA | FaceAUC | FLA   | VLA   |
| c0, LR     | MesoNet        | 83.59    | 0.5886 | 85.98  | 0.5230  | 75.62 | 84.48 | 87.78  | 0.6759  | 73.87 | 85.59 |
|            | Meso-Inception | 86.97    | 0.7265 | 80.57  | 0.5618  | 61.34 | 66.30 | 83.26  | 0.7561  | 66.18 | 65.41 |
|            | FWA            | 87.10    | 0.7758 | 76.10  | 0.5781  | 52.12 | 53.88 | 78.27  | 0.7494  | 57.57 | 49.67 |
|            | Xception       | 83.44    | 0.5914 | 84.29  | 0.5217  | 71.12 | 77.61 | 84.80  | 0.6853  | 68.61 | 77.16 |
|            | DSP-FWA        | 80.29    | 0.5000 | 90.75  | 0.5000  | 90.00 | 99.78 | 88.20  | 0.5000  | 74.38 | 99.78 |
|            | Capsule        | 93.01    | 0.8276 | 79.18  | 0.6363  | 60.70 | 64.75 | 80.07  | 0.7956  | 64.69 | 59.20 |
| c23, HR    | MesoNet        | 80.69    | 0.5163 | 88.65  | 0.5297  | 82.24 | 91.80 | 85.98  | 0.5360  | 69.57 | 89.36 |
|            | Meso-Inception | 81.01    | 0.5877 | 86.08  | 0.5648  | 74.94 | 82.48 | 85.42  | 0.6410  | 69.04 | 80.49 |
|            | FWA            | 82.08    | 0.5823 | 84.34  | 0.5384  | 72.40 | 80.49 | 83.85  | 0.5968  | 67.14 | 82.48 |
|            | Xception       | 80.89    | 0.5270 | 87.44  | 0.5317  | 79.10 | 87.80 | 83.91  | 0.5234  | 65.93 | 84.92 |
|            | DSP-FWA        | 85.18    | 0.6481 | 84.92  | 0.5350  | 71.96 | 77.16 | 87.19  | 0.7074  | 72.84 | 79.82 |
|            | Capsule        | 83.65    | 0.5946 | 86.91  | 0.6085  | 74.60 | 81.82 | 85.24  | 0.5586  | 68.35 | 85.81 |
| c23, LR    | MesoNet        | 82.14    | 0.5552 | 87.08  | 0.5374  | 78.30 | 85.81 | 87.12  | 0.6389  | 72.86 | 86.25 |
|            | Meso-Inception | 85.07    | 0.6644 | 84.48  | 0.5560  | 70.64 | 78.05 | 85.28  | 0.6707  | 69.07 | 80.27 |
|            | FWA            | 86.92    | 0.7228 | 79.07  | 0.5590  | 57.34 | 60.75 | 81.82  | 0.7094  | 63.06 | 64.75 |
|            | Xception       | 82.88    | 0.5833 | 82.98  | 0.5313  | 66.96 | 72.95 | 84.64  | 0.6209  | 67.09 | 78.05 |
|            | DSP-FWA        | 86.93    | 0.6832 | 84.77  | 0.5455  | 74.18 | 82.26 | 85.53  | 0.6609  | 70.84 | 81.15 |
|            | Capsule        | 90.35    | 0.7627 | 86.08  | 0.6064  | 73.80 | 81.15 | 87.04  | 0.7407  | 73.16 | 78.05 |
| c40, LR    | MesoNet        | 77.93    | 0.5509 | 82.92  | 0.5386  | 68.26 | 74.50 | 81.98  | 0.6176  | 63.62 | 73.61 |
|            | Meso-Inception | 78.84    | 0.6178 | 75.25  | 0.5332  | 53.44 | 56.98 | 77.90  | 0.6190  | 57.04 | 61.64 |
|            | FWA            | 80.07    | 0.6522 | 77.04  | 0.5369  | 56.78 | 61.42 | 76.87  | 0.6219  | 57.39 | 59.87 |
|            | Xception       | 78.68    | 0.5480 | 81.51  | 0.5221  | 65.28 | 72.95 | 81.39  | 0.5645  | 62.18 | 74.94 |
|            | DSP-FWA        | 78.79    | 0.5885 | 79.44  | 0.5392  | 59.94 | 64.75 | 79.64  | 0.6202  | 59.02 | 66.30 |
|            | Capsule        | 81.11    | 0.5753 | 85.32  | 0.5460  | 75.32 | 83.15 | 85.12  | 0.6353  | 70.03 | 83.15 |

Table 8. Performance obtained on the (c23, LR) test set of the proposed DF-Platter dataset for Sets A, B, and C. The models are trained for different combinations of resolution and compression as specified in the first column of the table. The performance is reported using Frame-level Accuracy (FLA) (%), AUC Scores, Face-wise Accuracy (FaceWA) (%), Face-wise AUC score (FaceAUC), and Video-level Accuracy (VLA) (%) as explained in the main paper.

| Trained on | Models         | Set A    |        | Set B  |         |       |       | Set C  |         |       |       |
|------------|----------------|----------|--------|--------|---------|-------|-------|--------|---------|-------|-------|
|            |                | Accuracy | AUC    | FaceWA | FaceAUC | FLA   | VLA   | FaceWA | FaceAUC | FLA   | VLA   |
| c0, HR     | MesoNet        | 81.53    | 0.5139 | 89.65  | 0.5176  | 86.00 | 96.23 | 87.77  | 0.5375  | 73.55 | 97.12 |
|            | Meso-Inception | 82.32    | 0.5538 | 85.06  | 0.5292  | 72.42 | 80.93 | 84.82  | 0.5699  | 67.50 | 83.81 |
|            | FWA            | 82.13    | 0.5589 | 82.58  | 0.5379  | 66.34 | 71.40 | 80.95  | 0.5368  | 60.18 | 75.39 |
|            | Xception       | 81.29    | 0.5302 | 87.25  | 0.5132  | 79.26 | 89.14 | 85.12  | 0.5356  | 68.13 | 88.69 |
|            | DSP-FWA        | 84.60    | 0.6067 | 79.22  | 0.5303  | 60.02 | 64.75 | 79.48  | 0.5776  | 57.83 | 65.85 |
|            | Capsule        | 83.38    | 0.5659 | 82.40  | 0.5376  | 67.88 | 74.50 | 78.15  | 0.4975  | 55.93 | 69.62 |
| c0, LR     | MesoNet        | 83.37    | 0.5599 | 86.65  | 0.5245  | 77.40 | 85.81 | 87.57  | 0.6460  | 73.36 | 86.70 |
|            | Meso-Inception | 86.07    | 0.6917 | 80.69  | 0.5698  | 61.76 | 65.41 | 83.12  | 0.7221  | 65.75 | 67.63 |
|            | FWA            | 86.25    | 0.7471 | 76.25  | 0.5836  | 52.44 | 53.88 | 77.44  | 0.7192  | 56.46 | 51.44 |
|            | Xception       | 83.29    | 0.5671 | 84.13  | 0.5168  | 70.58 | 77.83 | 84.37  | 0.6566  | 67.47 | 76.50 |
|            | DSP-FWA        | 81.32    | 0.5000 | 90.74  | 0.5000  | 90.00 | 99.78 | 88.19  | 0.5000  | 74.38 | 99.78 |
|            | Capsule        | 91.46    | 0.7787 | 78.64  | 0.6249  | 59.38 | 64.97 | 78.66  | 0.7598  | 61.70 | 57.43 |
| c23, HR    | MesoNet        | 81.55    | 0.5130 | 88.50  | 0.5233  | 82.08 | 92.02 | 86.08  | 0.5257  | 69.80 | 92.02 |
|            | Meso-Inception | 81.52    | 0.5818 | 85.74  | 0.5575  | 74.12 | 80.93 | 85.24  | 0.6387  | 68.76 | 80.27 |
|            | FWA            | 82.66    | 0.5792 | 84.24  | 0.5404  | 71.76 | 78.49 | 83.87  | 0.5957  | 66.84 | 81.37 |
|            | Xception       | 81.80    | 0.5241 | 87.24  | 0.5303  | 78.76 | 86.25 | 83.32  | 0.5070  | 65.02 | 82.71 |
|            | DSP-FWA        | 85.54    | 0.6427 | 83.98  | 0.5335  | 69.66 | 76.27 | 86.05  | 0.6941  | 70.51 | 78.94 |
|            | Capsule        | 84.39    | 0.5962 | 85.02  | 0.5568  | 72.04 | 79.82 | 84.35  | 0.5586  | 66.46 | 83.37 |
| c23, LR    | MesoNet        | 82.77    | 0.5462 | 87.12  | 0.5351  | 78.30 | 87.36 | 86.83  | 0.6209  | 72.13 | 86.47 |
|            | Meso-Inception | 85.77    | 0.6610 | 84.25  | 0.5441  | 70.50 | 78.27 | 85.44  | 0.6730  | 69.27 | 79.38 |
|            | FWA            | 86.97    | 0.7078 | 78.82  | 0.5566  | 58.00 | 63.86 | 80.44  | 0.6742  | 60.98 | 64.30 |
|            | Xception       | 83.58    | 0.5773 | 82.47  | 0.5292  | 65.72 | 72.28 | 84.32  | 0.6173  | 66.71 | 79.16 |
|            | DSP-FWA        | 87.14    | 0.6704 | 85.06  | 0.5581  | 74.02 | 81.60 | 85.42  | 0.6581  | 70.43 | 80.93 |
|            | Capsule        | 89.80    | 0.7345 | 85.89  | 0.6159  | 73.24 | 80.04 | 86.39  | 0.7205  | 71.95 | 78.71 |
| c40, HR    | MesoNet        | 81.18    | 0.5318 | 87.30  | 0.5233  | 79.10 | 88.69 | 86.34  | 0.5688  | 70.50 | 88.69 |
|            | Meso-Inception | 81.25    | 0.5573 | 83.34  | 0.5303  | 68.42 | 75.61 | 80.95  | 0.5566  | 60.07 | 72.28 |
|            | FWA            | 82.70    | 0.5971 | 83.13  | 0.5610  | 67.44 | 74.72 | 81.91  | 0.6117  | 62.25 | 72.51 |
|            | Xception       | 81.26    | 0.5470 | 85.21  | 0.5301  | 73.46 | 81.82 | 84.82  | 0.5791  | 67.69 | 83.37 |
|            | DSP-FWA        | 85.38    | 0.6242 | 83.42  | 0.5465  | 69.54 | 75.83 | 83.62  | 0.6139  | 66.35 | 76.50 |
|            | Capsule        | 83.98    | 0.6714 | 80.88  | 0.5974  | 62.16 | 67.18 | 78.87  | 0.6165  | 57.83 | 63.64 |
| c40, LR    | MesoNet        | 78.71    | 0.5451 | 82.92  | 0.5288  | 68.58 | 75.61 | 82.04  | 0.6063  | 63.55 | 73.84 |
|            | Meso-Inception | 79.83    | 0.6197 | 75.32  | 0.5362  | 53.82 | 58.54 | 77.94  | 0.6162  | 57.21 | 63.41 |
|            | FWA            | 80.53    | 0.6441 | 76.72  | 0.5311  | 56.74 | 60.98 | 77.68  | 0.6293  | 58.51 | 62.53 |
|            | Xception       | 79.41    | 0.5473 | 81.30  | 0.5260  | 65.04 | 71.40 | 81.43  | 0.5724  | 62.23 | 74.72 |
|            | DSP-FWA        | 79.51    | 0.5829 | 79.21  | 0.5368  | 59.34 | 64.75 | 79.69  | 0.6228  | 59.12 | 66.30 |
|            | Capsule        | 81.37    | 0.5587 | 84.64  | 0.5412  | 74.30 | 82.04 | 84.30  | 0.6175  | 68.58 | 80.27 |

Table 9. Performance obtained on the (c40, LR) test set of the proposed DF-Platter dataset for Sets A, B, and C. The models are trained for different combinations of resolution and compression as specified in the first column of the table. The performance is reported using Frame-level Accuracy (FLA) (%), AUC Scores, Face-wise Accuracy (FaceWA) (%), Face-wise AUC score (FaceAUC), and Video-level Accuracy (VLA) (%) as explained in the main paper.

| Trained on | Models         | Set A    |        | Set B  |         |       |       | Set C  |         |       |       |
|------------|----------------|----------|--------|--------|---------|-------|-------|--------|---------|-------|-------|
|            |                | Accuracy | AUC    | FaceWA | FaceAUC | FLA   | VLA   | FaceWA | FaceAUC | FLA   | VLA   |
| c0, HR     | MesoNet        | 81.36    | 0.5060 | 88.91  | 0.5129  | 84.06 | 93.79 | 87.34  | 0.5264  | 72.61 | 97.12 |
|            | Meso-Inception | 81.22    | 0.5205 | 85.52  | 0.5099  | 75.30 | 84.26 | 83.53  | 0.5267  | 65.22 | 83.15 |
|            | FWA            | 81.22    | 0.5290 | 83.13  | 0.5231  | 68.10 | 75.17 | 80.28  | 0.5009  | 58.84 | 75.39 |
|            | Xception       | 81.18    | 0.5207 | 85.59  | 0.5143  | 74.86 | 82.71 | 83.06  | 0.5021  | 63.82 | 84.26 |
|            | DSP-FWA        | 81.38    | 0.5607 | 71.54  | 0.4961  | 48.00 | 52.33 | 69.44  | 0.4472  | 44.61 | 54.99 |
|            | Capsule        | 81.81    | 0.5381 | 75.66  | 0.5067  | 59.88 | 66.74 | 69.42  | 0.4295  | 50.26 | 65.85 |
| c0, LR     | MesoNet        | 81.78    | 0.5171 | 87.01  | 0.5108  | 78.66 | 86.92 | 85.86  | 0.5490  | 70.07 | 88.25 |
|            | Meso-Inception | 82.15    | 0.5793 | 80.78  | 0.5324  | 62.98 | 69.40 | 80.09  | 0.5696  | 58.58 | 69.18 |
|            | FWA            | 82.07    | 0.6272 | 79.26  | 0.5419  | 59.50 | 64.97 | 76.81  | 0.6086  | 54.99 | 58.09 |
|            | Xception       | 81.56    | 0.5202 | 84.66  | 0.5015  | 72.98 | 81.37 | 80.96  | 0.5426  | 61.92 | 76.72 |
|            | DSP-FWA        | 81.36    | 0.5000 | 90.74  | 0.5000  | 90.00 | 99.78 | 87.94  | 0.5000  | 74.38 | 99.78 |
|            | Capsule        | 84.70    | 0.6403 | 74.51  | 0.5947  | 52.36 | 55.21 | 74.10  | 0.5940  | 54.00 | 58.76 |
| c23, HR    | MesoNet        | 81.37    | 0.5049 | 88.41  | 0.5185  | 82.40 | 92.68 | 85.89  | 0.5114  | 69.34 | 92.68 |
|            | Meso-Inception | 80.97    | 0.5466 | 84.35  | 0.5239  | 71.30 | 77.16 | 82.71  | 0.5848  | 62.86 | 76.27 |
|            | FWA            | 81.50    | 0.5390 | 84.18  | 0.5066  | 74.06 | 83.59 | 83.27  | 0.5255  | 66.38 | 85.81 |
|            | Xception       | 81.16    | 0.5069 | 86.48  | 0.5050  | 77.96 | 87.36 | 83.84  | 0.5141  | 65.74 | 85.59 |
|            | DSP-FWA        | 81.83    | 0.5786 | 81.51  | 0.5295  | 63.78 | 69.18 | 81.83  | 0.5839  | 61.69 | 73.17 |
|            | Capsule        | 81.93    | 0.5978 | 80.34  | 0.5194  | 62.02 | 70.51 | 79.26  | 0.5147  | 56.43 | 70.51 |
| c23, LR    | MesoNet        | 81.66    | 0.5142 | 86.91  | 0.5107  | 78.98 | 88.91 | 85.93  | 0.5548  | 69.45 | 90.24 |
|            | Meso-Inception | 83.00    | 0.5784 | 85.37  | 0.5153  | 74.44 | 82.26 | 86.54  | 0.6093  | 71.24 | 87.36 |
|            | FWA            | 82.99    | 0.6122 | 75.83  | 0.5215  | 53.62 | 58.09 | 77.35  | 0.5907  | 55.40 | 60.98 |
|            | Xception       | 82.00    | 0.5441 | 76.75  | 0.4959  | 55.36 | 59.20 | 78.40  | 0.5478  | 56.94 | 66.74 |
|            | DSP-FWA        | 83.00    | 0.5603 | 85.04  | 0.5522  | 73.54 | 81.60 | 82.33  | 0.5653  | 65.34 | 79.60 |
|            | Capsule        | 83.46    | 0.5794 | 83.97  | 0.5255  | 70.34 | 76.72 | 83.30  | 0.5675  | 64.28 | 79.60 |
| c40, HR    | MesoNet        | 81.34    | 0.5168 | 87.25  | 0.5220  | 79.26 | 88.91 | 84.70  | 0.5231  | 67.60 | 88.47 |
|            | Meso-Inception | 80.94    | 0.5298 | 83.53  | 0.5158  | 69.18 | 77.16 | 80.63  | 0.5255  | 58.43 | 72.51 |
|            | FWA            | 81.34    | 0.5499 | 82.43  | 0.5378  | 66.58 | 73.17 | 79.56  | 0.5286  | 57.26 | 71.62 |
|            | Xception       | 81.42    | 0.5291 | 84.81  | 0.5089  | 73.06 | 81.15 | 82.00  | 0.5259  | 63.27 | 79.82 |
|            | DSP-FWA        | 82.96    | 0.5630 | 81.35  | 0.5209  | 65.26 | 71.62 | 81.37  | 0.5150  | 60.98 | 77.61 |
|            | Capsule        | 82.39    | 0.6063 | 81.09  | 0.5670  | 64.06 | 70.95 | 78.60  | 0.5313  | 57.22 | 69.84 |
| c40, LR    | MesoNet        | 82.84    | 0.5571 | 78.49  | 0.5248  | 57.54 | 62.75 | 81.25  | 0.5847  | 61.54 | 72.95 |
|            | Meso-Inception | 84.69    | 0.6358 | 72.18  | 0.5139  | 47.46 | 50.11 | 73.04  | 0.5690  | 48.53 | 52.33 |
|            | FWA            | 84.86    | 0.6494 | 74.24  | 0.5194  | 50.92 | 54.10 | 75.30  | 0.5780  | 53.70 | 58.54 |
|            | Xception       | 83.24    | 0.5644 | 79.67  | 0.5164  | 61.86 | 67.85 | 79.28  | 0.5352  | 58.66 | 71.84 |
|            | DSP-FWA        | 84.42    | 0.6017 | 74.68  | 0.5131  | 50.76 | 55.21 | 74.66  | 0.5833  | 50.51 | 53.88 |
|            | Capsule        | 84.82    | 0.6042 | 77.31  | 0.5549  | 59.90 | 65.19 | 75.09  | 0.5751  | 56.81 | 65.41 |
